1 **Signaling compartment at the ciliary tip is formed and maintained**  
2 **by intraflagellar transport and functions as sensitive salt detector**

3

4 ***Servaas N. van der Burght<sup>1</sup>, Suzanne Rademakers<sup>1</sup>, Jacque-Lynne Johnson<sup>2,3</sup>, Chunmei Li<sup>2,3</sup>,***  
5 ***Gert-Jan Kremers<sup>4</sup>, Adriaan B. Houtsmuller<sup>4</sup>, Michel R. Leroux<sup>2,3</sup>, Gert Jansen<sup>1\*</sup>***

6

7 <sup>1</sup>Dept. of Cell Biology, Erasmus University Medical Centre, Rotterdam, The Netherlands

8 <sup>2</sup>Dept. of Molecular Biology and Biochemistry, Simon Fraser University, Burnaby, B.C., Canada

9 <sup>3</sup>Centre for Cell Biology, Development, and Disease, Simon Fraser University, Burnaby, B.C., Canada

10 <sup>4</sup>Optical Imaging Centre, Erasmus University Medical Centre, Rotterdam, The Netherlands

11

12 \*Corresponding author. Email: g.jansen@erasmusmc.nl

## 13 **Abstract**

14 Primary cilia are ubiquitous antenna-like organelles that mediate cellular signaling and represent  
15 hotspots for human diseases termed ciliopathies. How signaling subcompartments are established  
16 within the microtubule-based organelle, and for example support Hedgehog or cGMP signal  
17 transduction pathways, remains a central question. Here we show that a *C. elegans* salt-sensing  
18 receptor type guanylate cyclase, GCY-22, accumulates at a high concentration within the distal region  
19 of the cilium. This receptor uses DAF-25 (Ankmy2 in mammals) to cross the transition zone (TZ)  
20 membrane diffusion barrier in the proximal-most region of the ciliary axoneme. Targeting of GCY-22  
21 to the ciliary tip is dynamic, requiring the cargo-mobilizing intraflagellar transport (IFT) system.  
22 Disruption of transit across the TZ barrier or IFT trafficking causes GCY-22 protein mislocalization and  
23 defects in the formation, maintenance, and function of the ciliary tip compartment required for  
24 chemotaxis to low NaCl concentrations. Together, our findings reveal how a previously undescribed  
25 cilium tip cGMP signaling compartment is established and contributes to the physiological function of  
26 a primary cilium.

27

## 28 **Introduction**

29 The primary cilium is a specialized signaling organelle used by metazoan cells to transduce  
30 environmental cues. Signaling proteins important for cilia function must reach and maintain their  
31 correct sub-ciliary position and concentration. Failure to do so results in various diseases<sup>1</sup>. Our  
32 understanding of the regulation of protein localization in cilia, and their relevance in creating functional  
33 signaling domains, remains limited, however.

34

35 Cilia use two mechanisms, a trafficking system and a diffusion barrier, that function together to  
36 regulate the trafficking of proteins into, within, and out of cilia. The main ciliary trafficking machinery,  
37 intraflagellar transport (IFT), facilitates bidirectional transport of cargo, including signaling proteins,  
38 from the base/foundation (basal body) to the tip of the axoneme<sup>2</sup>. Anterograde IFT to the tip relies on  
39 kinesins, and cytoplasmic dynein enables retrograde transport back<sup>3,4</sup>. Two IFT modules,  
40 subcomplexes-A and -B<sup>5,6</sup>, together with another module containing BBS proteins (BBSome) that is  
41 thought to bridge the subcomplexes, play essential roles in cargo transport<sup>7,8</sup>. The best-known IFT  
42 cargos are axoneme structure components, including tubulin<sup>9,10</sup>, but signaling proteins, like the TRPV  
43 channel subunits OSM-9 and OCR-2 in the nematode *C. elegans*, are also transported<sup>11</sup>. Additionally,  
44 several mammalian ciliary signaling proteins, namely the GPCR SSTR3 and Hedgehog signaling  
45 component SMO, traverse the cilium by both IFT and diffusion<sup>12</sup>.

46

47 To help confine proteins to cilia, a subdomain immediately distal to the basal body, called the  
48 transition zone (TZ), acts as a diffusion barrier for both membrane and soluble proteins<sup>13–15</sup>. How the  
49 TZ acts with IFT or other trafficking systems to regulate the composition of the sensory organelle is  
50 not well understood<sup>16,17</sup>.

51  
52 Signaling proteins can have different sub-ciliary localizations, including the proximal or distal  
53 segments, or ciliary tip. For example, the *C. elegans* cyclic nucleotide gated channel TAX-2 localizes  
54 to the proximal region adjoining the TZ<sup>18</sup>, while OSM-9 and OCR-2<sup>11</sup> and several GPCRs<sup>18–20</sup> localize  
55 along the length of the cilium. In mammals, the kinesin-like protein KIF7 and Hedgehog signaling  
56 components SUFU and GLI2 localize at the cilium tip<sup>21–23</sup>. Mislocalization of ciliary proteins can impair  
57 signaling and development. For example, mislocalization of PDE6 and GRK1 can cause retinitis  
58 pigmentosa<sup>24</sup> and *BBS2* mutant mice display defects presumably caused by mislocalized rhodopsin<sup>25</sup>.  
59 Despite their importance, the mechanisms that govern how signaling components concentrate along  
60 specific ciliary subdomains remain largely unknown.

61  
62 To explore the molecular mechanisms underlying ciliary signaling domain formation, maintenance and  
63 function, we use the cilium-dependent NaCl response of *C. elegans* as a model system. Its attraction  
64 to NaCl is mediated by two bilateral chemosensory ASE head neurons that express receptor-type  
65 guanylate cyclases, including GCY-22 (ASER), required for responding to Cl<sup>-</sup>, and GCY-14 (ASEL),  
66 for the Na<sup>+</sup> response<sup>26–29</sup>.

67  
68 By endogenously tagging GCY-22 with GFP, we discovered that the guanylate cyclase exists at a  
69 high concentration in a cilium tip compartment. This localization depends on the IFT machinery,  
70 including the BBS complex. We further show that DAF-25 (mammalian Ankyr2 ortholog), is required  
71 for GCY-22 ciliary entry. Structure-function studies uncovered GCY-22 protein domains needed for  
72 entry and tip localization. Disrupting receptor localization at the tip compartment hinders the ability of  
73 *C. elegans* to detect low concentrations of NaCl. Together, our findings provide mechanistic insights  
74 into the formation, maintenance and function of a novel ciliary subdomain essential for cGMP-  
75 signaling.

## 76 77 **RESULTS**

### 78 **GCY-22::GFP is highly concentrated at the ASER ciliary tip and periciliary membrane** 79 **compartment**

80 We used CRISPR/Cas9 to tag the *gcy-22* gene with *GFP* and determine the sub-cellular localization  
81 of this receptor in the ASER neuron. Confocal microscopy and co-labeling with markers for the ER  
82 (TRAM-1) and trans Golgi (APT-9) revealed that GCY-22::GFP is present within both of these cell  
83 body compartments (**Fig. 1a, Supplementary Fig. 1a,b**). In the dendrite, time-lapse imaging revealed  
84 anterograde and retrograde transport of GCY-22::GFP (**Fig. 1c**), reminiscent of kinesin and dynein-  
85 mediated vesicle transport<sup>30</sup>. Auxin inducible degradation of the dynein heavy chain subunit DHC-1<sup>31</sup>  
86 resulted in stationary particles, showing that GCY-22::GFP dendritic transport is DHC-1-dependent

87 **(Fig. 1c)**. At the dendritic terminus, GCY-22::GFP is abundant at the periciliary membrane  
 88 compartment (PCMC), a vestibule of the cilium (**Fig. 1a**).

Figure 1

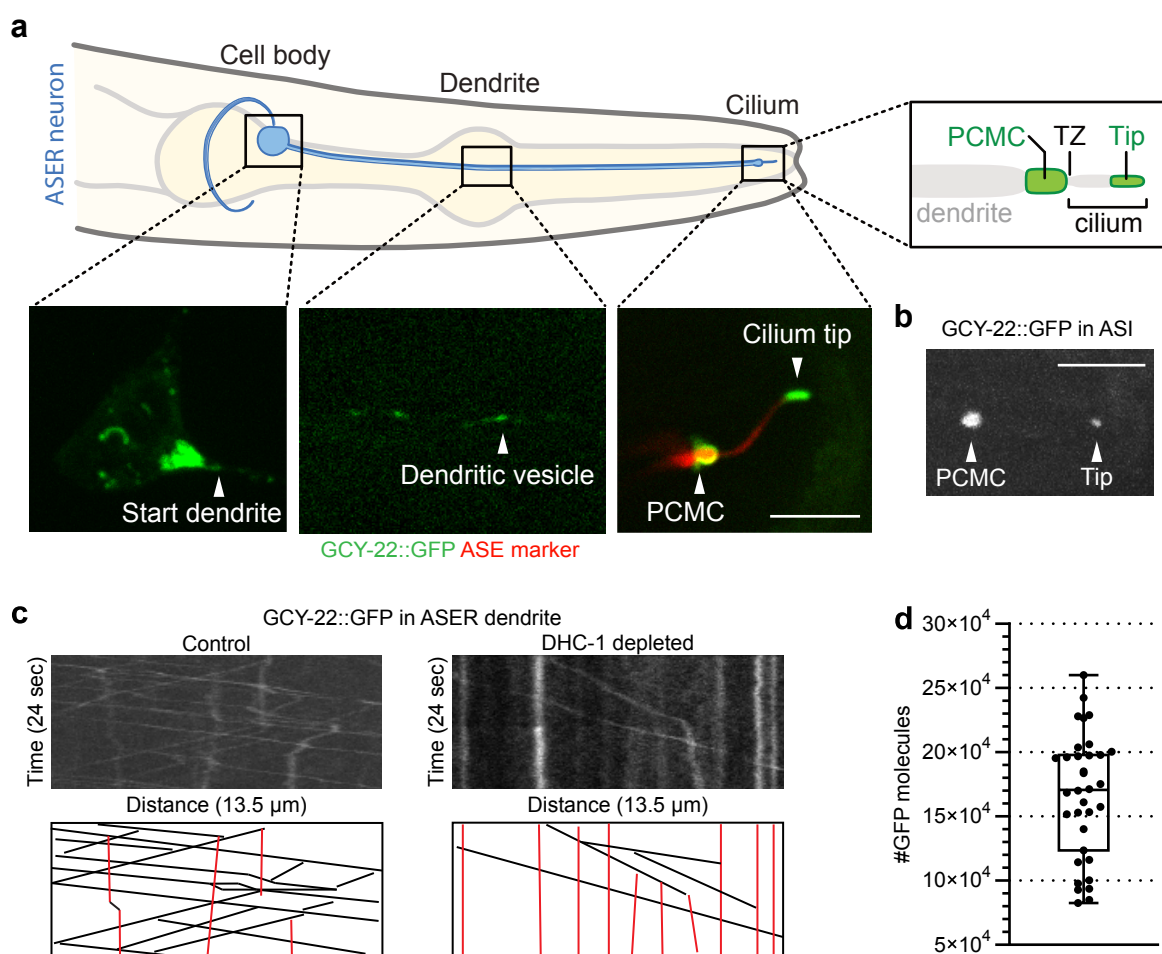

89  
 90 The most striking localization of GCY-22::GFP is its strong enrichment at the ciliary tip (**Fig. 1a**), but  
 91 not along the axoneme. GCY-22::GFP ectopically expressed in ASI localized to the PCMC and  
 92 ciliary tip, although in low amounts (**Fig. 1b**), suggesting a localization mechanism that is not cell  
 93 specific. Using purified GFP as reference, we estimated the ASE cilium tip concentration of GCY-  
 94 22::GFP to be 2.77 mM, reflecting an average density of 106,571 ( $\pm 31,016$ ) molecules/ $\mu\text{m}^2$  (**Fig. 1d**).  
 95 Only rhodopsin in mammalian photoreceptor cells has a similar density, of up to 48,300  
 96 molecules/ $\mu\text{m}^2$ , which enables photoreceptors to respond to single photons<sup>32-34</sup>. This suggests that  
 97 the ASE neuron ciliary tip compartment could function as a highly sensitive salt detector.

98  
 99 **GCY-22::GFP exists in stable pools at the periciliary membrane and ciliary tip**

100 To determine how GCY-22::GFP pools at the PCMC and ciliary tip are replenished, we used  
 101 Fluorescent Recovery after Photobleaching (FRAP). Recovery of the entire PCMC (28% after 25  
 102 minutes) was modest, potentially reflecting continuous transport of GCY-22::GFP from the cell body to

103 the dendritic terminus (**Fig. 2a**). Recovery of the entire ciliary tip was slower (7% after 25 minutes),  
 104 indicating little or slow transport towards the tip (**Fig. 2b**).

105

106 We photobleached half the PCMC or tip to assess GCY-22::GFP motility *within* these compartments.

107 GCY-22::GFP fully redistributed within the PCMC in 60 seconds (**Fig. 2c**) whereas tip recovery was

108 slower at 3-4 minutes (**Fig. 2d**). These experiments demonstrate lateral diffusion, and no bound

109 fraction, within the PCMC and tip compartments.

Figure 2

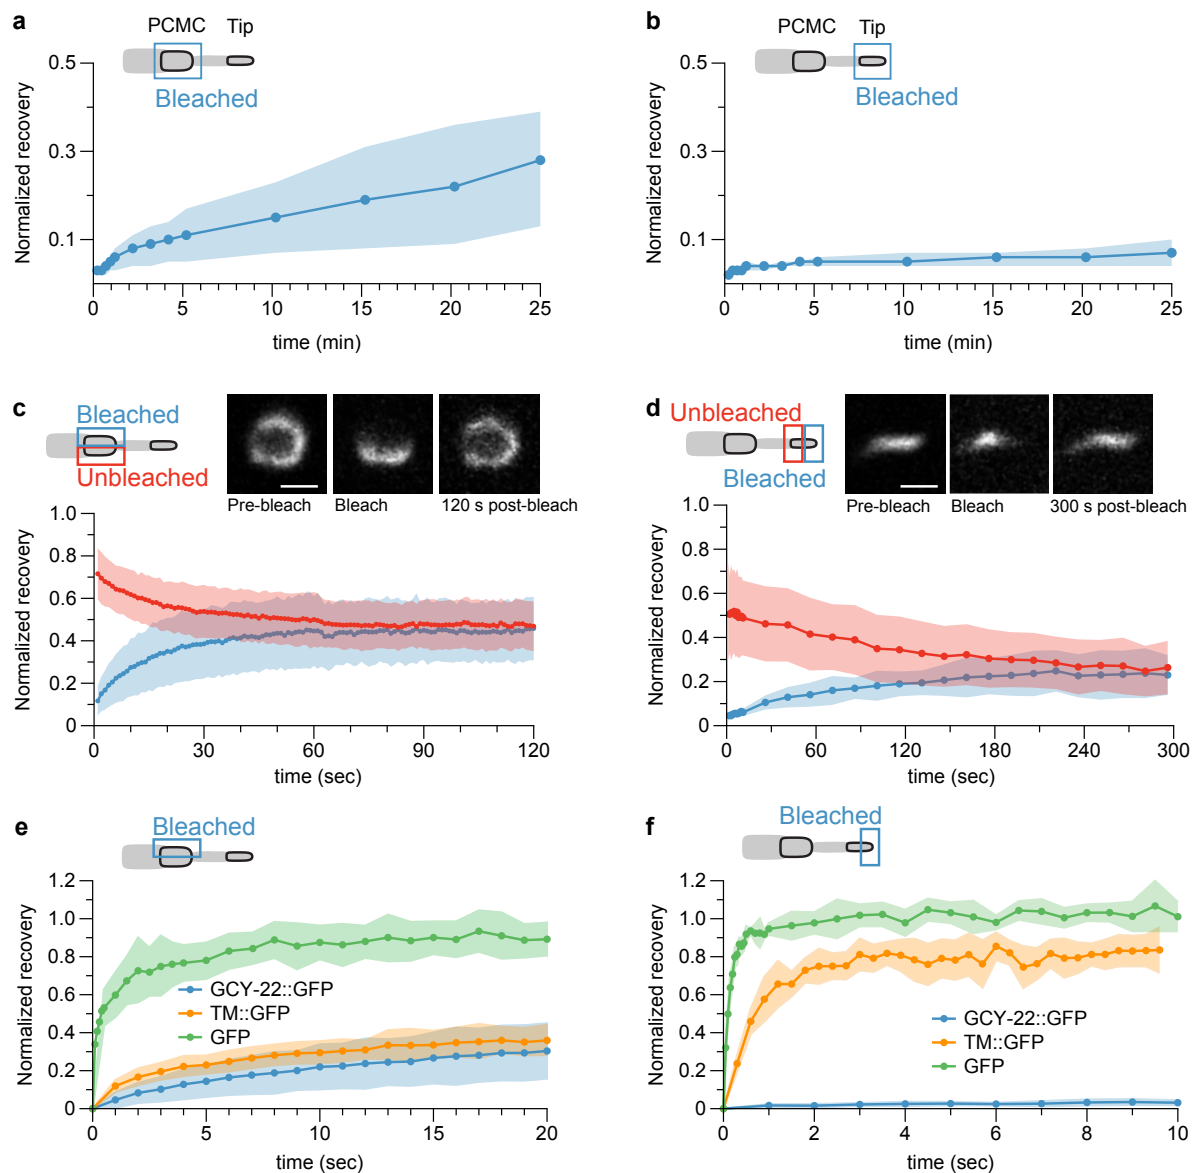

110

111 To place these results in context, we measured the redistribution of free GFP and of GFP fused to the  
 112 transmembrane domain of GCY-22 (TM::GFP). After photobleaching half the PCMC, GFP

113 fluorescence recovered quickly (~90% after 8 seconds). Recovery of TM::GFP was much slower

114 (~35% after 20 seconds) and comparable to GCY-22::GFP recovery, possibly due to protein crowding  
115 within the PCMC (**Fig. 2e**).

116

117 After photobleaching half of the cilium, free GFP fluorescence recovered very quickly (~100% after 2  
118 seconds). TM::GFP recovery was slightly slower (~80% after 3 seconds), reflecting slower diffusion of  
119 transmembrane proteins. In contrast, GCY-22::GFP recovered minimally 10 seconds after  
120 photobleaching, indicating the presence of a distinct membrane compartment limiting GCY-22::GFP  
121 motility (**Fig. 2f**).

122

### 123 **Ciliary tip compartment of GCY-22::GFP depends on active IFT**

124 Because the proximal region of the axoneme (middle segment) and part of the distal segment  
125 seemed void of GCY-22::GFP, we hypothesized that it might be actively transported by IFT. In  
126 *C. elegans*, anterograde IFT relies on kinesin-II and OSM-3 (ortholog of mammalian KIF17) in the  
127 middle segment and OSM-3 alone in the distal segment<sup>3,4,16,35</sup>.

128

129 Using time-lapse microscopy and kymogram analysis, we identified GCY-22::GFP particles moving  
130 between the PCMC and ciliary tip (**Fig. 3a**). Two-color imaging of GCY-22::GFP and an mCherry-  
131 tagged OSM-3 showed overlapping anterograde tracks (**Fig. 3b**). On average, we observed 37.75 ( $\pm$   
132 8.23) anterograde OSM-3::mCherry tracks/minute compared to 5.93 anterograde GCY-22::GFP  
133 tracks/minute, suggesting that a subset of IFT particles transport GCY-22::GFP (**Table 1**,  
134 **Supplementary Table 1**). Anterograde OSM-3::mCherry particles often move along the full length of  
135 the cilium (average track length  $2.75 \pm 0.54 \mu\text{m}$ ); in contrast, GCY-22::GFP tracks spanned half the  
136 cilium or shorter (average length  $1.0 \pm 0.4 \mu\text{m}$ ,  $P < 0.001$ , **Fig. 3c**). Retrograde GCY-22::GFP particles  
137 displayed short tracks and occasionally tracks spanning the entire axoneme (average length  $1.3 \pm 0.8$   
138  $\mu\text{m}$ ), significantly shorter than retrograde tracks of the tdTomato tagged dynein subunit XBX-1  
139 (average length  $2.12 \pm 0.59 \mu\text{m}$ ,  $P < 0.001$ ) (**Fig. 3c**).

140

141 In many animals, stationary fluorescence signals that indicate paused particles are observed, likely at  
142 the transition between the middle and distal segments (**Fig. 3a**). Interestingly, GCY-22::GFP tracks  
143 frequently reversed from retrograde to anterograde, docking with an anterograde OSM-3::mCherry  
144 track and moving towards the tip (**Fig. 3b**). Notably, this behavior was not observed for IFT proteins.  
145 These data suggest that GCY-22::GFP particles moving away from the tip are transported back by  
146 anterograde IFT, keeping GCY-22::GFP concentrated at the tip.

Figure 3

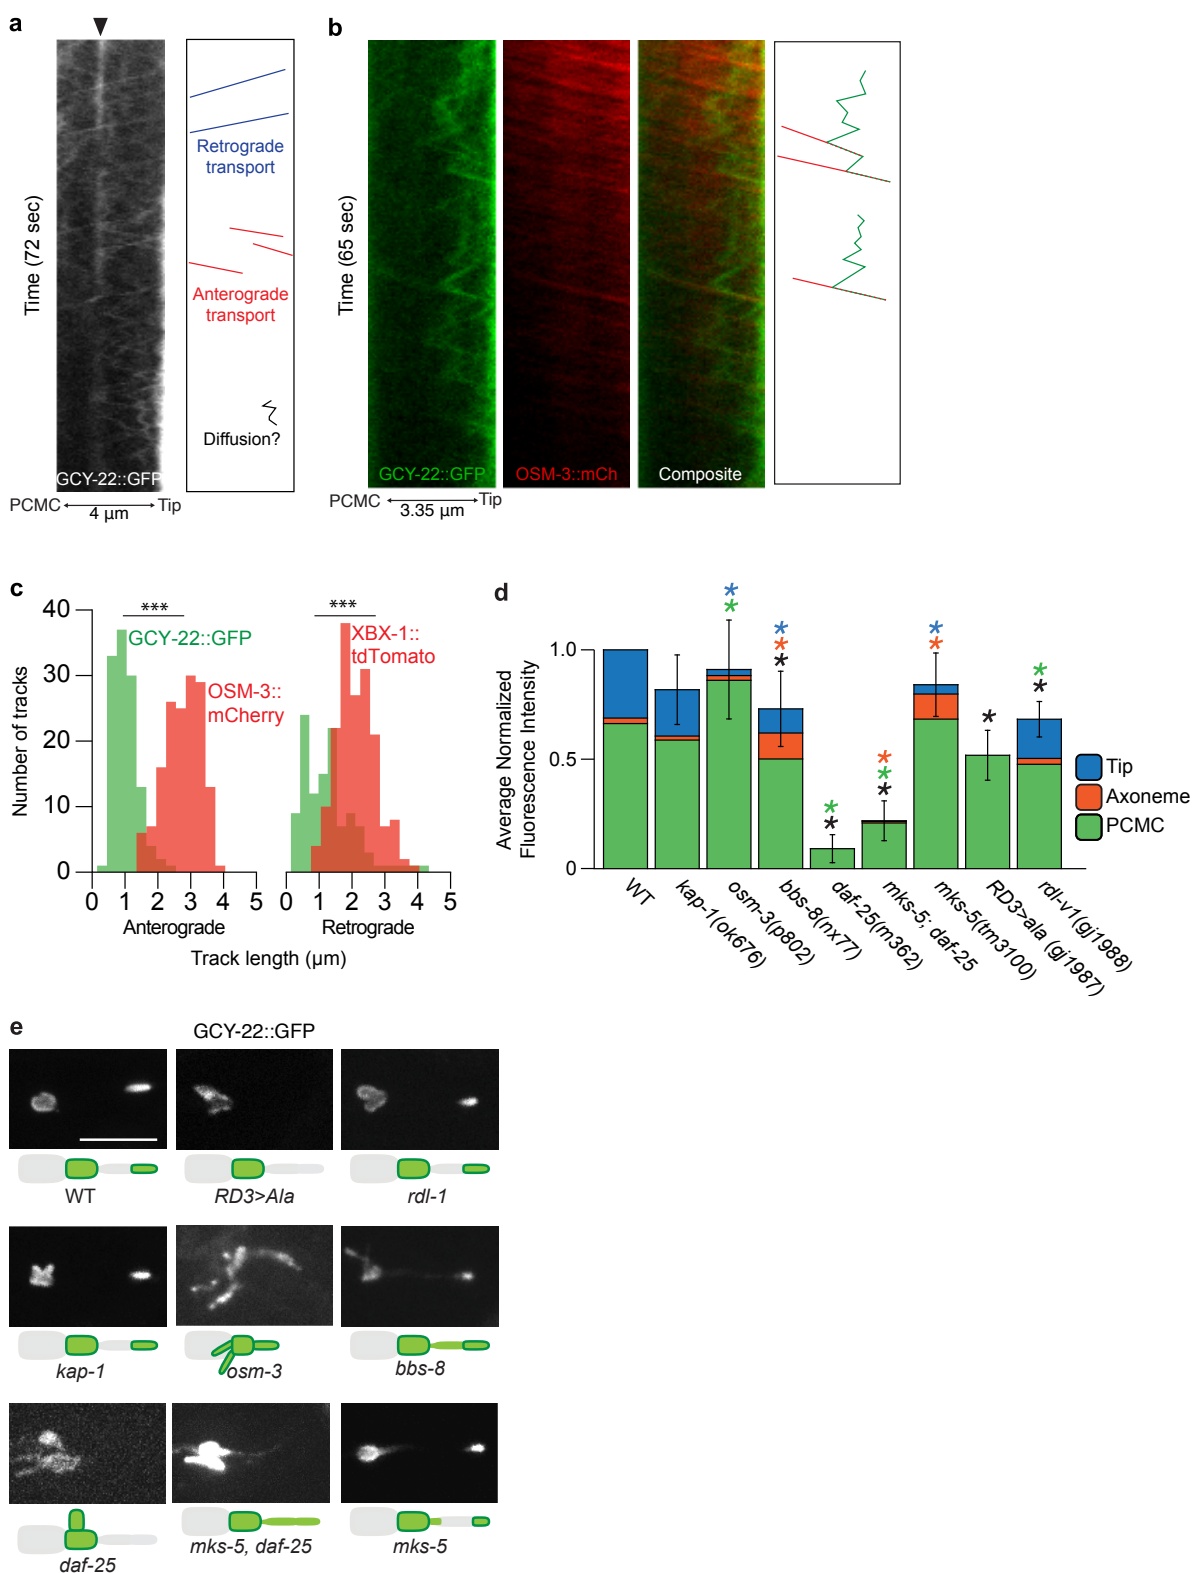

147

148 To study the contribution of IFT to cilium tip localization, we visualized the localization of GCY-  
 149 22::GFP in different IFT mutant backgrounds. Disrupting the kinesin-II subunit KAP-1, which plays a  
 150 role in IFT particle entry into the cilium but does not affect cilium length<sup>3,16,35</sup>, did not influence ciliary



151 GCY-22::GFP levels or localization (**Fig. 3d,e**). In contrast, *osm-3* mutants lacking a distal segment  
 152 showed increased levels of GCY-22::GFP in the PCMC and along the remaining axoneme but no  
 153 GCY-22::GFP tip compartment (**Fig. 3d,e**). Disruption of the BBSome subunit BBS-8<sup>36</sup> reduced  
 154 overall ciliary levels of GCY-22::GFP, including at the tip, while increasing its localization along the  
 155 length of the cilium (**Fig. 3d,e**). These changes in GCY-22::GFP localization correlate with a decrease  
 156 in GCY-22::GFP tracks (**Table 1**). Taken together, our results show that kinesin-II is not required for  
 157 import of GCY-22::GFP into the cilium, and that both OSM-3-mediated IFT and the BBSome are  
 158 important for transport into the cilium and enrichment at the tip.

159  
 160 To test if IFT is responsible for the ciliary tip localization of GCY-22::GFP, we used NaN<sub>3</sub> to stop ATP  
 161 production, and thus IFT, over time<sup>37</sup>. OSM-3::mCherry particles slowed down and became less  
 162 frequent after 10 minutes of treatment (**Fig. 4a,b**). IFT capacity, defined as the number of IFT tracks  
 163 multiplied by speed, reached 0 after 30-50 minutes (**Fig. 4b**). During treatment, cilium length steadily  
 164 shortened, while the GCY-22::GFP tip compartment extended into the cilium as early as 10 minutes in  
 165 some animals and completely collapsed after 20-30 minutes (**Fig. 4a,c**). Importantly, loss of cilium tip  
 166 localization after 30 minutes of NaN<sub>3</sub> treatment was reversible, with complete recovery within 16  
 167 minutes (**Fig. 4d**). These experiments suggest that a minimal IFT capacity is needed to maintain  
 168 GCY-22::GFP tip localization, although we cannot exclude an IFT-independent mechanism caused by  
 169 the NaN<sub>3</sub> treatment.

170  
 171 Taken together, these experiments show that IFT plays an important role in actively maintaining the  
 172 high GCY-22 concentration at the ciliary tip.

173

174 **Table 1.** Quantification of GCY-22::GFP tracks in the cilium in different mutant backgrounds.

| Genotype                  | # animals with tracks (n) | P-value <sup>a</sup> | Total min. analyzed | Total anterograde tracks (tracks/min) | Total retrograde tracks (tracks/min) |
|---------------------------|---------------------------|----------------------|---------------------|---------------------------------------|--------------------------------------|
| Wild type                 | 17(18)                    | -                    | 22.75               | 135 (5.93)                            | 146 (6.42)                           |
| <i>kap-1</i>              | 16(18)                    | 1                    | 18                  | 179 (9.94)                            | 127 (7.06)                           |
| <i>osm-3</i>              | 7(13)                     | 0.026                | 19.5                | 33 (1.7)                              | 18 (0.9)                             |
| <i>bbs-8</i>              | 12(17)                    | 0.094                | 28.5                | 65 (2.3)                              | 25 (0.9)                             |
| <i>daf-25</i>             | 0(18)                     | <0.001               | -                   | -                                     | -                                    |
| <i>mks-5</i>              | 5(14)                     | <0.001               | 21                  | 35 (1.7)                              | 9 (0.4)                              |
| <i>mks-5; daf-25</i>      | 4(21)                     | <0.001               | 17.5                | 22 (1.3)                              | 6 (0.3)                              |
| <i>gcy-22(RD3&gt;ala)</i> | 0(16)                     | <0.001               | -                   | -                                     | -                                    |
| <i>rdl-1</i>              | 9(13)                     | 0.136                | 19.5                | 52 (2.7)                              | 63 (3.2)                             |

<sup>a</sup> $\chi^2$ -test was used to compare distributions of animals with and without GCY-22::GFP tracks to WT.



Figure 4

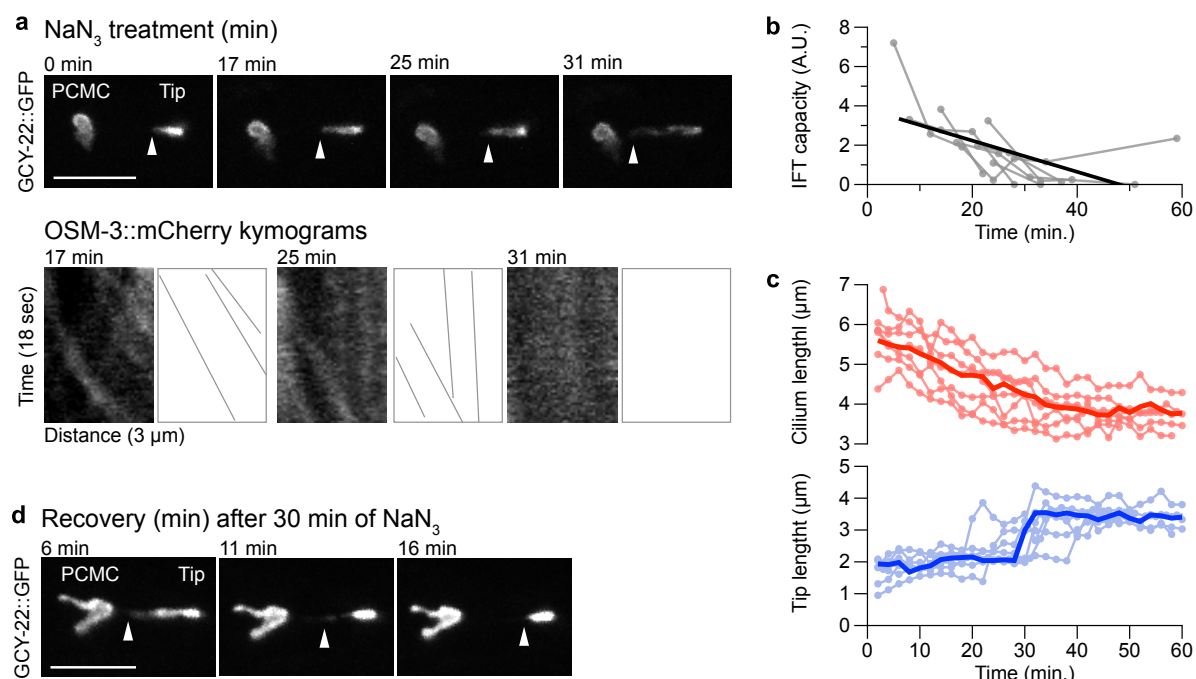

175

176 **GCY-22 trafficking and cilium import is regulated by the transition zone and requires DAF-25**

177 The accumulation of GCY-22::GFP at the PCMC suggests that it is prevented from readily diffusing  
 178 into the cilium. We therefore tested whether disruption of the TZ influences its ciliary entry.

179 Surprisingly, loss of MKS-5 (mammalian RPGRIP1/RPGRIP1L ortholog), which removes all known  
 180 proteins and characteristic Y-link structures from the TZ<sup>13,14,38</sup>, has a relatively subtle effect on GCY-  
 181 22::GFP localization—it mislocalizes at the TZ and base of the axoneme, and displays a reduced  
 182 amount at the cilium tip (**Fig. 3d,e**). The lack of increased entry suggested a mechanism other than  
 183 the TZ in regulating GCY-22::GFP ciliary entry.

184

185 The Ankyr2 protein DAF-25 is known to be required for ciliary localization of guanylate cyclases<sup>38–40</sup>,  
 186 cyclic nucleotide gated channels and GPCRs<sup>18,38</sup>, but not for IFT<sup>39</sup>. In *daf-25* mutants, GCY-22::GFP  
 187 did not enter the cilium, and no IFT tracks of GCY-22::GFP or cilium tip localization was observed  
 188 (**Fig. 3d,e, Table 1**). Interestingly, *daf-25* animals showed lower levels of GCY-22::GFP at the PCMC,  
 189 very few moving vesicles and diffuse fluorescence in the dendrite, and more diffuse localization in the  
 190 cell body, which did not overlap with the trans-Golgi marker APT-9::mCherry (**Fig. 3e**,

191 **Supplementary Fig. 1-3**). To test whether DAF-25 functions together with the TZ to traffic GCY-  
 192 22::GFP into the cilium, we generated a *daf-25; mks-5* mutant strain. In this double mutant, GCY-  
 193 22::GFP was present at low levels in the cilium but not at the tip (**Fig. 3d,e**). Very few IFT tracks of  
 194 GCY-22::GFP were visible, potentially explaining the lack of cilium tip localization (**Table 1**). Because  
 195 OSM-3-mediated IFT is not affected in *daf-25; mks-5* animals (**Supplementary Table 1**), MKS-5 and

196 DAF-25 may be required to link GCY-22::GFP to the IFT machinery, allowing for the formation of the  
 197 cilium tip compartment.

198

199 Together, our data reveals that DAF-25 is required for GCY-22::GFP import across the TZ and into  
 200 the cilium, and together with the core TZ scaffolding protein MKS-5 is involved in loading GCY-  
 201 22::GFP as IFT cargo.

202

### 203 GCY-22::GFP localization requires its dimerization and RD3-associated domains

204 To identify protein domains required for GCY-22::GFP ciliary trafficking, we generated a series of  
 205 deletion constructs. Several domains can be recognized in GCY-22 (**Fig. 5**), including an extracellular  
 206 receptor domain which possibly provides specificity for Cl<sup>-</sup> ions<sup>28,29</sup>. These experiments showed that  
 207 its dimerization and RD3 domains are required for cilium entry (**Fig. 5**).

Figure 5

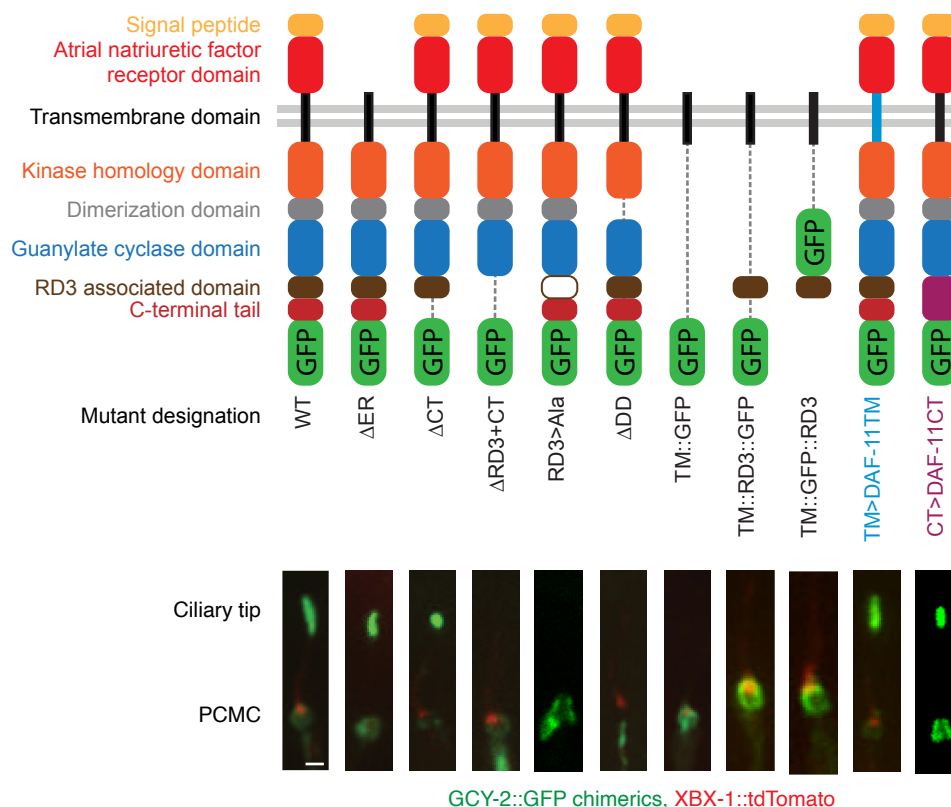

208

209 The RD3 domain shows homology to the RD3-binding domain identified in the mammalian guanylate  
 210 cyclase GUCY2D/GC1<sup>41,42</sup>. In a *gcy-22 loss-of-function* background, GCY-22(ΔRD3+CT)::GFP  
 211 localized at the PCMC but did not enter the cilium (**Fig. 5**). To confirm that the RD3 domain is  
 212 required for cilium import, we replaced 8 residues (W1042-I1049) of this domain with alanines using  
 213 CRISPR/Cas9, to create GCY-22(RD3>Ala)::GFP. This mutation completely abolished ciliary entry

214 **(Fig. 3d,e)**. More diffuse fluorescence in the dendrite and cell body was also observed, reflecting a  
215 potential trafficking defect of GCY-22(RD3>Ala)::GFP (**Supplementary Fig. 3**).

216

217 Next, we tested if the RD3 domain is *sufficient* for cilium entry by generating two RD3::GFP constructs  
218 fused with the GCY-22 transmembrane (TM) domain (TM::GFP::RD3 and TM::RD3::GFP). These  
219 proteins showed diffuse localization in the cell body, some dendritic transport, PCMC localization, and  
220 a very weak ciliary signal with no evidence of IFT transport (**Fig. 5, Supplementary Fig. 4**). These  
221 results suggest that the RD3 domain is not sufficient for correct routing and import in the cilium.

222

223 The *C. elegans* RD3 orthologue, RDL-1, influences the trafficking of GCYs to the PCMC and cilium<sup>43</sup>.  
224 Mutating *rdl-1* reduced GCY-22::GFP levels in the PCMC but not cilium tip (**Fig. 3d,e**). In addition,  
225 GCY-22::GFP was more diffuse in the cell body and dendrite (**Supplementary Fig. 1,3**), in  
226 agreement with RDL-1 regulating an early trafficking pathway for GCYs<sup>43</sup>.

227

228 In contrast to GCY-22::GFP, the guanylate cyclase DAF-11 localizes along the entire cilium in ASI,  
229 ASJ and ASK neurons<sup>39,44</sup>. We swapped the GCY-22 TM domain or C-terminal end, starting at the  
230 highly conserved W residue at the start of the RD3 domain, with those of DAF-11 (TM>DAF-11 TM  
231 and CT>DAF-11 CT, respectively). Both chimeric proteins localized to the PCMC and cilium tip,  
232 suggesting that the TM domains and C-termini of GCY-22 and DAF-11 do not regulate their sub-  
233 ciliary localization (**Fig. 5**). In addition, these results suggest that the C-terminal region of these  
234 guanylate cyclases functions cell independently in cilium import.

235

236 Together, our data show that GCY-22 ciliary entry and tip localization requires the dimerization and  
237 RD3 domains, and likely involve the combined action of more than one domain.

238

### 239 **GCY-22::GFP cilium tip compartment is required for high NaCl sensitivity**

240 ASE neurons express several receptor-type guanylate cyclases, GCY-22 and GCY-14 appearing to  
241 be most important for detecting NaCl<sup>26,28,29</sup>. We tested *gcy-22* and *gcy-14* loss-of-function mutants  
242 and a *gcy-14; gcy-22* double mutant in a NaCl chemotaxis quadrant assay. Animals are tested for  
243 their preference for a particular NaCl concentration versus no NaCl<sup>45,46</sup>. Deleting *gcy-22*, but not *gcy-*  
244 *14*, significantly affected chemotaxis to NaCl (**Fig. 6a**). Chemotaxis by the double mutant was not  
245 significantly different from the *gcy-22* single mutant, suggesting that GCY-22 is more important than  
246 GCY-14 in our assay (**Fig. 6a**).

Figure 6.

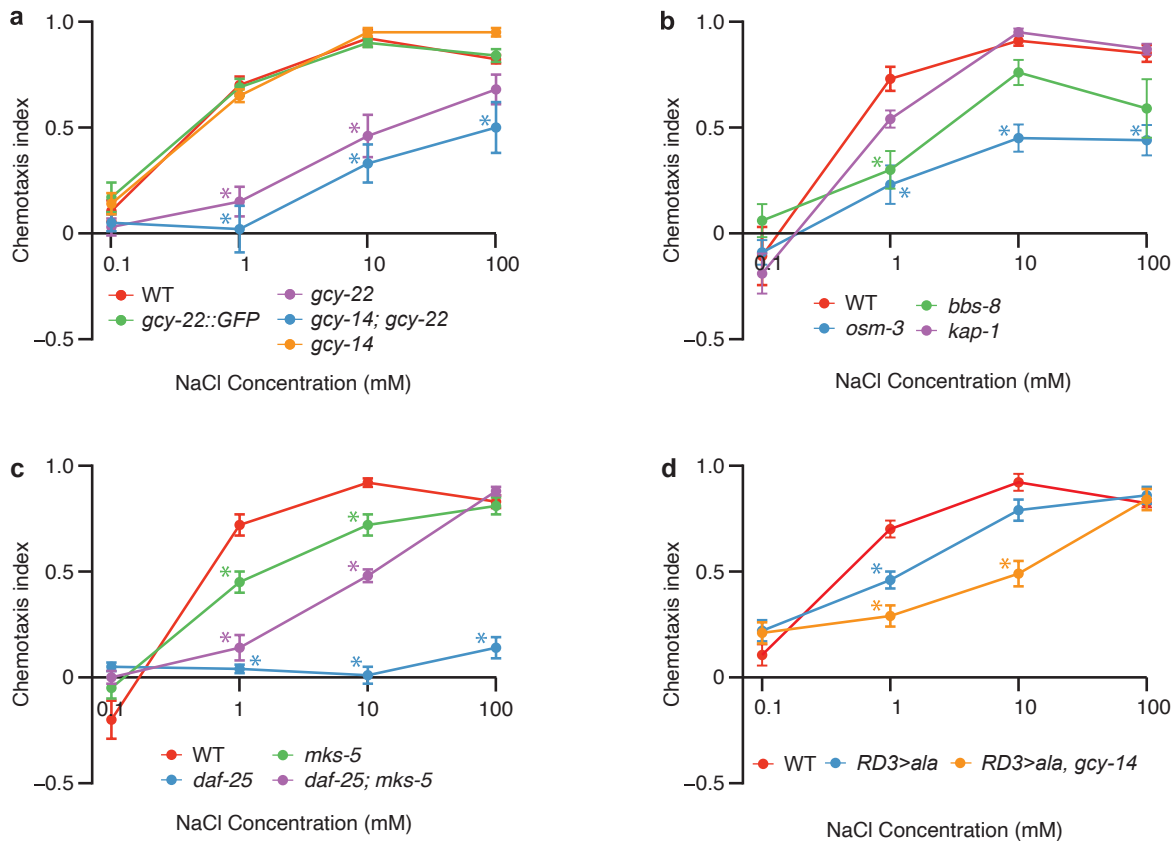

247

248 To determine if GCY-22 cilium tip localization is important for *C. elegans*' sensitivity to NaCl, we first  
 249 tested IFT mutants for their chemotaxis response. *kap-1* mutant animals showed a wild-type response  
 250 to NaCl (**Fig. 6b**), consistent with the normal tip localization of GCY-22::GFP. *bbs-8* mutant animals  
 251 showed reduced chemotaxis to 1 mM NaCl ( $P < 0.01$ ; **Fig. 6b**), which correlates with the reduced  
 252 cilium tip levels of GCY-22::GFP. *osm-3* mutant animals, which have short cilia where GCY-22::GFP  
 253 localizes along its entire length, showed the strongest chemotaxis defect at all NaCl concentrations  
 254 tested ( $P < 0.01$ ; **Fig. 6b**).

255

256 Next, we tested *daf-25* mutant animals, which lack ciliary GCY-22::GFP. These animals showed a  
 257 strong chemotaxis defect, with only a modest response to 100 mM NaCl (**Fig. 6c**). This suggests that  
 258 *daf-25* is required for ciliary import of proteins essential for chemotaxis, and consistent with the  
 259 mislocalization of guanylate cyclases and CNGs<sup>18,39,40</sup>. Surprisingly, disrupting the TZ in the *daf-25*  
 260 mutant (*daf-25; mks-5* double mutant) resulted in a partially-restored response to 10 mM NaCl, and a  
 261 wild-type response to 100 mM (**Fig. 6c**). These responses roughly correlate with the levels of ciliary  
 262 GCY-22::GFP, where the increased amount in the double mutant appears sufficient for detecting high

263 NaCl concentrations. However, the possibility remains that other proteins that play a role in NaCl  
264 sensory transduction are also affected.

265

266 To specifically test the contribution of GCY-22::GFP ciliary tip localization to NaCl sensation, we  
267 tested the RD3>Ala mutant animals for their chemotaxis response. These animals showed a mild  
268 chemotaxis defect at 1 mM NaCl ( $P=0.023$ ), but wild-type responses to 10 and 100 mM NaCl  
269 (**Fig. 6d**), suggesting that a small amount of GCY-22 could still be present in the cilium. Additionally, a  
270 chemotaxis defect in these animals could be masked by functional redundancy. To test this latter  
271 possibility, we made a *gcy-14; gcy-22(RD3>Ala)* double mutant and observed a stronger chemotaxis  
272 defect at 10 mM NaCl ( $P=0.020$ ) compared to *gcy-22(RD3>Ala)* single mutants (**Fig. 6d**).

273 Interestingly, *gcy-14; gcy-22(RD3>Ala)* animals showed stronger chemotaxis to 100 mM NaCl than  
274 *gcy-14; gcy-22* animals ( $P=0.004$ ), indicating that the GCY-22::RD3>Ala protein is functional in  
275 detecting NaCl.

276

277 Together these experiments show that a high level of GCY-22 is required at the cilium tip for  
278 detecting, and efficient chemotaxis to, low NaCl concentrations.

279

## 280 Discussion

281 Some signaling proteins localize to specific ciliary subdomains, whereas others distribute along the  
282 length of the cilium, suggesting that their specific localization patterns are functionally important. Our  
283 understanding of how the signaling protein localization within the cilium is regulated remains limited.  
284 Here, we identified mechanisms involved in the localization of the putative Cl<sup>-</sup> receptor GCY-22 to a  
285 unique ciliary tip domain in the ASER neuron of *C. elegans* and provide evidence that this specific  
286 localization is essential for its function as a highly sensitive NaCl sensor.

287

288 Our results suggest that IFT is the primary driving force behind GCY-22 localization to the cilium tip.  
289 First, we identified DAF-25 as essential for ciliary import. DAF-25 functions together with the TZ, by  
290 way of MKS-5, to load GCY-22 as cargo onto IFT particles. Second, dual-color imaging showed co-  
291 localization of GCY-22::GFP with OSM-3-kinesin in a subset of IFT particles, suggesting association  
292 between GCY-22::GFP and certain IFT particles or 'trains'. Strikingly, many GCY-22::GFP particles  
293 moving towards the ciliary base were picked up by anterograde IFT trains and relocalized to the tip.  
294 This behavior, not previously observed for other IFT-associated proteins, maintains a high density of  
295 receptor molecules within the tip compartment. How this is regulated—for example, whether this  
296 depends on differential affinity for anterograde or retrograde IFT machinery—remains to be  
297 determined. Finally, interfering with IFT diminishes the accumulation of GCY-22::GFP at the tip. This  
298 indicates that IFT plays a crucial role in actively maintaining a specialized signaling compartment at  
299 the cilium tip.

300

301 Interestingly, our FRAP assays indicate the presence of a distinct tip membrane compartment with  
302 properties different from the rest of the cilium. GCY-22 might therefore bind other, yet-to-be-identified  
303 protein(s) at the cilium tip. Similarly, how Hedgehog signaling components remain confined to the  
304 cilium tip is unknown<sup>47</sup>. However, we found a high density of GCY-22::GFP molecules at the cilium tip,  
305 which slows lateral diffusion<sup>48</sup>. This may explain, independent of tethering by other proteins, the slow  
306 redistribution of GCY-22::GFP in the tip compartment.

307

308 The high concentration of GCY-22 at the ciliary tip suggests that it forms a highly sensitive detection  
309 apparatus, reminiscent of the high densities of rhodopsin in mammalian photoreceptor cells, which  
310 enable the detection of single photons<sup>34,49</sup>. Indeed, mislocalization of GCY-22::RD3>Ala::GFP  
311 affected chemotaxis to 1 mM NaCl most, suggesting that the ciliary tip compartment is required to  
312 navigate small differences in NaCl concentrations, likely important for *C. elegans* in its natural habitat.

313

314 In conclusion, our study revealed mechanisms for generating and maintaining a specialized ciliary tip  
315 domain that is analogous to the cGMP signaling domain of mammalian ciliary photoreceptors, and  
316 ciliary tip domain of the Hedgehog signaling cascade. Our findings suggest that such domains may be  
317 broadly used as signaling compartments and should be sought and analysed in mammalian cilia in  
318 the context of different signaling pathways, human physiology and disease.

319

## 320 **Methods**

### 321 *Strains and Constructs*

322 Strains were cultured using standard methods<sup>50</sup>. Alleles used in this research were: *kap-1(ok676)*,  
323 *osm-3(p802)*, *bbs-8(nx77)*, *daf-25(m362)*, *mks-5(tm3100)*, *gcy-14(pe1102)*, *gcy-22(tm2364)*, *dhc-*  
324 *1(ie28[dhc-1::degron::GFP])*, *ieSi57[eft-3p::TIR1::mRuby::unc-54 3'UTR + Cbr-unc-119(+)]*.

325

326 The *p<sub>rab-3</sub>::mCherry::apt-9* construct was (gift from A. Pasparaki) and used to generate *p<sub>rab-</sub>*  
327 *3::mCherry::tram-1*. A 1.5 kb genomic DNA fragment containing *tram-1* was amplified with primers  
328 #2581 and #2582 and used to replace *apt-9*. *p<sub>gpa-4</sub>::gcy-22::GFP* was generated by inserting two PCR  
329 fragments of 2.5 kb and 2 kb, amplified with primers #3152 and #3154, and primers #3153 and  
330 #3151, together containing the genomic *gcy-22* locus, into pGJ325<sup>46</sup>. To generate the *p<sub>U6</sub>::osm-*  
331 *3\_sgRNA* vector we cloned an *osm-3* guide into the *p<sub>U6</sub>::unc-119::sgRNA* vector<sup>51</sup>. The *p<sub>flp-6</sub>::mCherry*  
332 construct was generated by inserting a 2 kb *flp-6* promoter sequence, amplified with primers #2867  
333 and #2869, into a pPD95.77 (gift from A. Fire) backbone containing *mCherry*. The *osm-3::mCherry*  
334 template construct was generated by inserting *mCherry* and two 1.5 kb homology arms, amplified  
335 from genomic DNA using primers #2679 and #2643 and primers #2660 and #2646, into the backbone  
336 of *p<sub>U6</sub>::unc-119::sgRNA*. The *p<sub>gcy-5</sub>::xbx-1::tdTomato* construct was generated by inserting a 325 bp  
337 promoter from *gcy-5*, amplified using primers 355 and 356, and a 2.2 kb genomic fragment of *xbx-1*,



338 amplified using primers 326 and 327, into a pPD95.81 vector containing *tdTomato*. The  $p_{gcy-5}::gcy-$   
339  $22::GFP$  construct was generated by PCR fusion<sup>52</sup>. First, a 4.6 kb genomic sequence of *gcy-22*,  
340 amplified using primers #221 and #248, and a 325 bp genomic fragment of the *gcy-5* promoter,  
341 amplified using primers #219 and #222, were fused using primers #443 and #215. Subsequently, this  
342 product was fused upstream of the GFP-coding cassette, including the *unc-54* 3'-UTR, from  
343 pPD95.67 (gift from A. Fire) using primers #220 and #609. The final fusion product was cloned into  
344 pGEMT easy.

345

346 The  $\Delta ER$  strain was generated by fusing the 426 bp *gcy-5* promoter, amplified with primers #218 and  
347 #458, and a 2.6 kb  $\Delta ER$  fragment, amplified from genomic DNA using primers #457 and #248, using  
348 primers #219 and #215. This product was fused to  $GFP::unc-54-3'-UTR$  from pPD95.67 using primers  
349 #220 and #609. The  $\Delta CT$  strain was generated by amplifying from  $p_{gcy-5}::gcy-22::GFP$ , a  $p_{gcy-5}::gcy-$   
350  $22::\Delta CT$  fragment, using primers M13Fwd and #433, and *GFP* using primers #432 and M13Rev, and  
351 fusing these products using primers #220 and #609. The  $\Delta RD3+CT$  strain was generated by fusing a  
352 *gcy-22* fragment upstream of the RD3 domain, amplified using primers #434 and #435, and a  
353 fragment containing GFP, amplified using primers #152 and #434, using primers #220 and #609. The  
354  $\Delta DD$  strain was generated by amplifying fragments upstream and downstream of the DD from  $p_{gcy-}$   
355  $5::gcy-22::GFP$  using primers #470 and #219, and primers #469 and #609, and fusing these products  
356 using primers #220 and #609. The  $TM>DAF-11TM$  strain was generated by amplifying  $p_{gcy-5}::gcy-$   
357  $22::GFP$  fragments up and downstream of the *TM*, using primers #440 and #443, and primers #441  
358 and #215. Primers #441 and #440 contained overlapping regions of the *daf-11 TM*. Primers #443 and  
359 #215 were used to fuse these two fragments.

360

361 The  $TM::GFP$  strain was generated by fusing a *gcy-22 TM* fragment, amplified from  $\Delta ER$  using  
362 primers #219 and #454, to *GFP* using primers #220 and #609. The  $TM::RD3::GFP$  strain was  
363 generated by amplifying a  $p_{gcy-5}::gcy-22(TM)$  fragment, amplified from  $p_{gcy-5}::gcy-22(TM)::GFP$  using  
364 primers #220 and #607. Next, a *gcy-22(RD3)* fragment, amplified from genomic DNA using primers  
365 #606 and #607, was fused to  $GFP::unc-54-3'-UTR$  pPD95.77, using primers #608 and #609. Finally,  
366 the  $p_{gcy-5}::gcy-22(TM)$  and  $RD3::GFP::unc-54-3'-UTR$  fragments were fused using primers #220 and  
367 #609.  $TM::GFP::RD3$  strain was generated by amplifying a  $p_{gcy-5}::gcy-22(TM)::GFP$  fragment without  
368 *unc-54* 3'-UTR from  $p_{gcy-5}::gcy-22(TM)::GFP$  using primers #220 and #601, and a *gcy-22(RD3)*  
369 fragment from genomic DNA using primers #602 and #603. Subsequently, these two fragments were  
370 fused using primers #220 and #604.

371

372 PCR fusion products were injected with  $p_{gcy-5}::xbx-1::tdTomato$ , and pRF4::*rol-6(su1006)*<sup>53</sup> or  $p_{unc-}$   
373  $122::GFP$ <sup>54</sup> to generate transgenic strains.

374



### 375 *Microinjections*

376 Microinjections were performed using standard methods<sup>55</sup>.

377

### 378 *CRISPR/Cas9*

379 To generate the *osm-3::mCherry* allele, animals were injected with a mixture containing *p<sub>U6</sub>::osm-*  
380 *3\_sgRNA* (45 ng/μl), *p<sub>eff-3</sub>::cas9-SV40-NLS::tbb-2* (50 ng/μl), *pRF4::rol-6(su1006)* (50 ng/μl), and a  
381 plasmid containing an *mCherry* repair template with 1500 bp homology arms (20 ng/μl). Animals were  
382 injected and placed on separate 6 cm NGM plates. Three days later, F1 offspring was picked, allowed  
383 to self-reproduce, and screened by PCR. We used a *dpy-10* based co-CRISPR method and a PCR-  
384 generated repair template of GFP, amplified with primers #3120 and #3121, with 35 bp homology  
385 arms to generate the *gcy-22::GFP(gj1976)* allele. We used ssODN repair template #3393, with 35 bp  
386 homology arms, and guide g10, to generate the *gcy-22(RD3>Ala)::GFP(gj1987)* allele. The *rdl-*  
387 *1(gj1989)* deletion allele was generated using two guides, g14 and g15, and no template.

388

389 We used the CRISPR/Cas9 method as described by Dokshin *et al.*<sup>56</sup> to generate the *gj2113[gcy-*  
390 *22::CT>daf-11CT::GFP]* allele. Briefly, a gBlock (IDT) containing the *daf-11CT* repair template was  
391 cloned into a pGEM vector. Subsequently, the repair template was amplified using primers #3404 and  
392 #3405 with 35 bp homology arms. The repair template, guide (g10), and *pRF-4::rol-6(su1006)* were  
393 injected into GJ3452 according to protocol.

394

395 A list of strains, primers, and guides used in this research can be found in Supplementary Table 3.

396

### 397 *Microscopy*

398 Animals were immobilized on a 6% agarose pad, using 0.10 μm polystyrene microspheres (Polybead,  
399 Polysciences Inc.) and 10 mM Levamisole (Sigma) as an anesthetic in M9 buffer, unless stated  
400 otherwise. Fluorescence images were taken using a spinning disc confocal microscope (Nikon Ti-  
401 eclipse) with an EM CCD camera (QuantEM512C, Photometrics) and Metamorph Imaging software,  
402 unless stated otherwise. Images were analyzed using FIJI software (version 2.0.0).

403

404 For FRAP experiments, a FRAP3D unit (ROPER) was used. Pre-bleach, 10 images were taken at 1  
405 second intervals. Post-bleach the following images were taken: for the entire PCMC or tip 4 images at  
406 15 sec. intervals, 4 images at 60 sec. intervals, and 4 images at 5 min. intervals; for half of the PCMC  
407 120 images at 1 sec. intervals ; for half of the cilium tip 10 images at 1 sec. intervals and 18 images at  
408 15 sec. intervals; for GFP 200 images at 50 ms intervals (a subset was plotted in **Fig. 2f**); for  
409 TM::GFP in the PCMC 20 images at 1 sec. intervals; for TM::GFP in the cilium tip 33 images at 300  
410 ms intervals. For the time-lapse images, animals were immobilized on a 6% agarose pad and M9  
411 containing 10 mM Levamisole. Images were taken at 300 ms intervals and kymograms were

412 generated using the KymographClear 1.0. ImageJ plugin<sup>57</sup>. Kymograms were analyzed using a  
413 custom ImageJ plugin written by I. Smal. Dual color time-lapse images were taken using a DV2 beam  
414 splitter (MAG Biosystems).

415

416 Quantification of GCY-22::GFP fluorescence in different mutant backgrounds, and of GFP molecules  
417 at the cilium tip, was performed on a laser scanning confocal microscope (SP5 AOBS, Leica). A  
418 dilution series of purified GFP in PBS was used to generate a calibration curve for the GFP  
419 fluorescence. Assuming a confocal volume of 0.1 femtoliter the fluorescence intensity of the  
420 calibration curve was converted into number of GFP molecules. The integrated fluorescence intensity  
421 of the cilia was measured and converted to number of GFP molecules. The membrane density of  
422 GFP molecules in the cilium tip was calculated, assuming a membrane surface of 1.56  $\mu\text{m}^2$ .

423

#### 424 *NaN<sub>3</sub> treatment*

425 To stop ATP production, NaN<sub>3</sub> (Sigma) was added to a 6% agarose pad at a concentration of 20 mM.  
426 Animals were shortly incubated in a drop of M9 containing 10 mM Levamisole (Sigma) before  
427 immobilization. Imaging started 10 min after immobilization. To assess the recovery of the cilium tip,  
428 animals were incubated in M9 buffer containing 20 mM NaN<sub>3</sub> for 30 min and subsequently  
429 immobilized for imaging without NaN<sub>3</sub>.

430

#### 431 *Auxin inducible degradation*

432 For the auxin inducible degradation of DHC-1::GFP::degron, animals were cultured on NMG plates  
433 containing 1 mM IAA (Sigma) for 48 hrs prior to imaging.

434

#### 435 *Chemotaxis assays*

436 The quadrant assay used to assess chemotaxis to NaCl was adapted from Wicks *et al.* and Jansen *et*  
437 *al.*<sup>45,46</sup>. Briefly, two diagonally opposite quadrants of a sectional petri dish (Star Dish, Phoenix  
438 Biomedical) were filled with 13.5 mL buffered agar (1.7% Agar, 5 mM K<sub>2</sub>HPO<sub>4</sub>/KH<sub>2</sub>PO<sub>4</sub> pH 6, 1 mM  
439 CaCl<sub>2</sub> and 1 mM MgSO<sub>4</sub>) containing NaCl and two diagonally opposite quadrants with 13.5 mL  
440 buffered agar without NaCl. Immediately before the assay, the plastic dividers between the quadrants  
441 were covered with a thin layer of agar. Age synchronized *C. elegans* populations were washed 3  
442 times for 5 min with CTX buffer (5 mM K<sub>2</sub>HPO<sub>4</sub>/KH<sub>2</sub>PO<sub>4</sub> pH 6, 1 mM CaCl<sub>2</sub> and 1 mM MgSO<sub>4</sub>).  
443 Approximately 100 animals were placed in the middle of a sectional dish. After 10 min, animals on  
444 each quadrant were counted and a chemotaxis index (CI) was calculated for each plate (CI = (#  
445 animals on NaCl – # animals not on NaCl)/ total # animals). To determine the CI of a strain, 2 assays  
446 per day were performed on at least 3 days.

447

448 *Statistics*

449 Statistical analyses were performed using R software, version 3.6.0. IFT track lengths were compared  
450 using a Mann-Whitney U test. Comparisons of the chemotaxis indexes, florescence intensities, and  
451 OSM-3::mCherry track counts and speeds were performed with a one-way ANOVA, followed by a  
452 pairwise t-test with Holm correction. Distributions of animals with and without GCY-22::GFP IFT-like  
453 tracks were compared using a Chi<sup>2</sup>-test.

454

455 **Acknowledgements**

456 We thank C.L. van der Burght for discussions on statistical analyses. We thank A. Fire, A. Pasparaki  
457 and I. Smal for reagents. Some strains were provided by the CGC, which is funded by NIH Office of  
458 Research Infrastructure Programs (P40 OD010440), and the Mitani lab through the National Bio-  
459 Resource Project of the MEXT, Japan. This work is part of the research program of the Foundation for  
460 Fundamental Research on Matter (FOM), which is financially supported by the Netherlands  
461 Organization for Scientific Research (NWO). The studies are also funded by the Canadian Institutes  
462 of Health Research (CIHR; grants PJT-156042 and MOP-142243). M.R.L. acknowledges a senior  
463 scholar award from Michael Smith Foundation for Health Research (MSFHR).

464

465 **Author Contributions**

466 S.N.B., M.R.L., and G.J. conceived the study. S.N.B. and S.R. generated strains, performed  
467 experiments and analyzed the data. J.J. and C.L. generated strains, performed experiments and  
468 analyzed the data for the construct-based domain deletion experiments. S.R. and G.K. designed and  
469 performed the experiments and analysed the data for the GFP quantification experiment. S.R. and  
470 S.N.B. designed experiments, S.R. performed the experiments, and S.R., S.N.B., and A.B.H.  
471 analysed the data for the FRAP experiments. S.N.B., M.R.L. and G.J. wrote the manuscript.

472

473 **Competing interests**

474 The authors declare no competing interests.

475 **References**

476

- 477 1. Reiter, J. F. & Leroux, M. R. Genes and molecular pathways underpinning ciliopathies. *Nat. Rev.*  
478 *Mol. Cell Biol.* **18**, 533 (2017).
- 479 2. Lechtreck, K. F. IFT–Cargo Interactions and Protein Transport in Cilia. *Trends Biochem. Sci.* **40**,  
480 765–778 (2015).
- 481 3. Ou, G., Blacque, O. E., Snow, J. J., Leroux, M. R. & Scholey, J. M. Functional coordination of  
482 intraflagellar transport motors. *Nature* **436**, 583–587 (2005).
- 483 4. Snow, J. J. *et al.* Two anterograde intraflagellar transport motors cooperate to build sensory cilia  
484 on *C. elegans* neurons. *Nat. Cell Biol.* **6**, 1109–1113 (2004).
- 485 5. Cole, D. G. *et al.* Chlamydomonas Kinesin-II–dependent Intraflagellar Transport (IFT): IFT  
486 Particles Contain Proteins Required for Ciliary Assembly in *Caenorhabditis elegans* Sensory  
487 Neurons. *J. Cell Biol.* **141**, 993–1008 (1998).
- 488 6. Ou, G. *et al.* Sensory Ciliogenesis in *Caenorhabditis elegans*: Assignment of IFT Components  
489 into Distinct Modules Based on Transport and Phenotypic Profiles. *Mol. Biol. Cell* **18**, 1554–1569  
490 (2007).
- 491 7. Liu, P. & Lechtreck, K. F. The Bardet–Biedl syndrome protein complex is an adapter expanding  
492 the cargo range of intraflagellar transport trains for ciliary export. *Proc. Natl Acad. Sci. USA* **115**,  
493 E134–E943 (2018).
- 494 8. Klink, B. U. *et al.* A recombinant BBSome core complex and how it interacts with ciliary cargo.  
495 *Elife* **6**, e27434 (2017).
- 496 9. Hao, L. *et al.* Intraflagellar transport delivers tubulin isotypes to sensory cilium middle and distal  
497 segments. *Nat. Cell Biol.* **13**, 790–798 (2011).
- 498 10. Craft, J. M., Harris, J. A., Hyman, S., Kner, P. & Lechtreck, K. F. Tubulin transport by IFT is  
499 upregulated during ciliary growth by a cilium-autonomous mechanism. *J. Cell Biology* **208**, 223–  
500 237 (2015).
- 501 11. Qin, H. *et al.* Intraflagellar Transport Is Required for the Vectorial Movement of TRPV Channels in  
502 the Ciliary Membrane. *Curr. Biol.* **15**, 1695–1699 (2005).
- 503 12. Ye, F. *et al.* Single molecule imaging reveals a major role for diffusion in the exploration of ciliary  
504 space by signaling receptors. *Elife* **2**, e00654 (2013).
- 505 13. Williams, C. L. *et al.* MKS and NPHP modules cooperate to establish basal body/transition zone  
506 membrane associations and ciliary gate function during ciliogenesis. *J. Cell Biol.* **192**, 1023–1041  
507 (2011).
- 508 14. Li, C. *et al.* MKS5 and CEP290 Dependent Assembly Pathway of the Ciliary Transition Zone.  
509 *PLoS Biol.* **14**, e1002416 (2016).
- 510 15. Garcia, G., Raleigh, D. R. & Reiter, J. F. How the Ciliary Membrane Is Organized Inside-Out  
511 to Communicate Outside-In. *Curr. Biol.* **28**, R421–R434 (2018).

- 512 16. Prevo, B., Mangeol, P., Oswald, F., Scholey, J. M. & Peterman, E. J. G. Functional differentiation  
513 of cooperating kinesin-2 motors orchestrates cargo import and transport in *C. elegans* cilia. *Nat.*  
514 *Cell Biol.* **17**, 1536–1545 (2015).
- 515 17. Ye, F., Nager, A. R. & Nachury, M. V. BBSome trains remove activated GPCRs from cilia by  
516 enabling passage through the transition zone. *J. Cell Biol.* **217**, jcb.201709041 (2018).
- 517 18. Wojtyniak, M., Brear, A. G., O'Halloran, D. M. & Sengupta, P. Cell- and subunit-specific  
518 mechanisms of CNG channel ciliary trafficking and localization in *C. elegans*. *J. Cell Sci.* **126**,  
519 4381–4395 (2013).
- 520 19. Kim, K. *et al.* Two Chemoreceptors Mediate Developmental Effects of Dauer Pheromone in *C.*  
521 *elegans*. *Science* **326**, 994–998 (2009).
- 522 20. McGrath, P. T. *et al.* Parallel evolution of domesticated *Caenorhabditis* species targets  
523 pheromone receptor genes. *Nature* **477**, 321–325 (2011).
- 524 21. Liem, K. F., He, M., Ocbina, P. J. R. & Anderson, K. V. Mouse Kif7/Costal2 is a cilia-associated  
525 protein that regulates Sonic hedgehog signaling. *Proc. Natl Acad. Sci. USA* **106**, 13377–13382  
526 (2009).
- 527 22. Endoh-Yamagami, S. *et al.* The Mammalian Cos2 Homolog Kif7 Plays an Essential Role in  
528 Modulating Hh Signal Transduction during Development. *Curr. Biol.* **19**, 1320–1326 (2009).
- 529 23. He, M. *et al.* The kinesin-4 protein Kif7 regulates mammalian Hedgehog signalling by organizing  
530 the cilium tip compartment. *Nat. Cell Biol.* **16**, 663–672 (2014).
- 531 24. Zhang, H. *et al.* Mistrafficking of prenylated proteins causes retinitis pigmentosa 2. *FASEB J.* **29**,  
532 932–942 (2014).
- 533 25. Nishimura, D. Y. *et al.* Bbs2-null mice have neurosensory deficits, a defect in social dominance,  
534 and retinopathy associated with mislocalization of rhodopsin. *Proc. Natl Acad. Sci. USA* **101**,  
535 16588–16593 (2004).
- 536 26. Ortiz, C. O. *et al.* Searching for neuronal left/right asymmetry: genomewide analysis of nematode  
537 receptor-type guanylyl cyclases. *Genetics* **173**, 131–149 (2006).
- 538 27. Etchberger, J. F. *et al.* The molecular signature and cis-regulatory architecture of a *C. elegans*  
539 gustatory neuron. *Gene. Dev.* **21**, 1653–1674 (2007).
- 540 28. Ortiz, C. O. *et al.* Lateralized gustatory behavior of *C. elegans* is controlled by specific receptor-  
541 type guanylyl cyclases. *Curr. Biol.* **19**, 996–1004 (2009).
- 542 29. Smith, H. K. *et al.* Defining Specificity Determinants of cGMP Mediated Gustatory Sensory  
543 Transduction in *Caenorhabditis elegans*. *Genetics* **194**, 885–901 (2013).
- 544 30. Mondal, S., Ahlawat, S., Rau, K., Venkataraman, V. & Koushika, S. P. Imaging in vivo Neuronal  
545 Transport in Genetic Model Organisms Using Microfluidic Devices. *Traffic* **12**, 372–385 (2011).
- 546 31. Zhang, L., Ward, J. D., Cheng, Z. & Dernburg, A. F. The auxin-inducible degradation (AID)  
547 system enables versatile conditional protein depletion in *C. elegans*. *Development* **142**, 4374–  
548 4384 (2015).

- 549 32. Rieke, F. & Baylor, D. A. Single-photon detection by rod cells of the retina. *Rev. Mod. Phys.* **70**,  
550 1027–1036 (1998).
- 551 33. Fotiadis, D. *et al.* Atomic-force microscopy: Rhodopsin dimers in native disc membranes. *Nature*  
552 **421**, 127–128 (2003).
- 553 34. Niu, S. L. & Mitchell, D. C. Effect of Packing Density on Rhodopsin Stability and Function in  
554 Polyunsaturated Membranes. *Biophys. J.* **89**, 1833–1840 (2005).
- 555 35. Pan, X. *et al.* Mechanism of transport of IFT particles in *C. elegans* cilia by the concerted action of  
556 kinesin-II and OSM-3 motors. *J. Cell Biol.* **74**, 1035–1045 (2006).
- 557 36. Blacque, O. E. *et al.* Loss of *C. elegans* BBS-7 and BBS-8 protein function results in cilia defects  
558 and compromised intraflagellar transport. *Gene. Dev.* **18**, 1630–1642 (2004).
- 559 37. Mijalkovic, J. *et al.* Cutting off ciliary protein import: Intraflagellar transport after dendritic  
560 femtosecond-laser ablation. *Mol. Biol. Cell.* mbc.E18-06-0399 (2020).
- 561 38. Brear, A. G., Yoon, J., Wojtyniak, M. & Sengupta, P. Diverse Cell Type-Specific Mechanisms  
562 Localize G Protein-Coupled Receptors to *Caenorhabditis elegans* Sensory Cilia. *Genetics* **197**,  
563 667–684 (2014).
- 564 39. Jensen, V. L. *et al.* Localization of a Guanylyl Cyclase to Chemosensory Cilia Requires the Novel  
565 Ciliary MYND Domain Protein DAF-25. *PLoS Genet.* **6**, e1001199 (2010).
- 566 40. Fujiwara, M., Teramoto, T., Ishihara, T., Ohshima, Y. & McIntire, S. L. A Novel zf-MYND Protein,  
567 CHB-3, Mediates Guanylyl Cyclase Localization to Sensory Cilia and Controls Body Size of  
568 *Caenorhabditis elegans*. *PLoS Genet.* **6**, e1001211 (2010).
- 569 41. Azadi, S., Molday, L. L. & Molday, R. S. RD3, the protein associated with Leber congenital  
570 amaurosis type 12, is required for guanylate cyclase trafficking in photoreceptor cells. *Proc. Natl*  
571 *Acad. Sci. USA* **107**, 21158–21163 (2010).
- 572 42. Zulliger, R., Naash, M. I., Rajala, R. V. S., Molday, R. S. & Azadi, S. Impaired Association of  
573 Retinal Degeneration-3 with Guanylate Cyclase-1 and Guanylate Cyclase-activating Protein-1  
574 Leads to Leber Congenital Amaurosis-1. *J. Biol. Chem.* **290**, 3488–3499 (2015).
- 575 43. Martínez-Velázquez, L. A. & Ringstad, N. Antagonistic regulation of trafficking to *Caenorhabditis*  
576 *elegans* sensory cilia by a Retinal Degeneration 3 homolog and retromer. *Proc. Natl Acad. Sci.*  
577 *USA* **115**, E438–E447 (2018).
- 578 44. Birnby, D. A. *et al.* A transmembrane guanylyl cyclase (DAF-11) and Hsp90 (DAF-21) regulate a  
579 common set of chemosensory behaviors in *Caenorhabditis elegans*. *Genetics* **155**, 85–104  
580 (2000).
- 581 45. Wicks, S. R., Vries, C. J. de, Luenen, H. G. A. M. van & Plasterk, R. H. A. CHE-3, a Cytosolic  
582 Dynein Heavy Chain, Is Required for Sensory Cilia Structure and Function in *Caenorhabditis*  
583 *elegans*. *Dev. Biol.* **221**, 295–307 (2000).
- 584 46. Jansen, G. *et al.* The complete family of genes encoding G proteins of *Caenorhabditis elegans*.  
585 *Nat. Genet.* **21**, 414–419 (1999).



- 586 47. He, M., Agbu, S. & Anderson, K. V. Microtubule Motors Drive Hedgehog Signaling in Primary  
587 Cilia. *Trends Cell Biol.* **27**, 110–125 (2017).
- 588 48. Houser, J. R. *et al.* The impact of physiological crowding on the diffusivity of membrane bound  
589 proteins. *Soft Matter* **12**, 2127–2134 (2016).
- 590 49. Baylor, D., Lamb, T. & Yau, K. Responses of retinal rods to single photons. *J. Physiol.* **288**, 613–  
591 634 (1979).
- 592 50. Brenner, S. The genetics of *Caenorhabditis elegans*. *Genetics* **77**, 71–94 (1974).
- 593 51. Friedland, A. E. *et al.* Heritable genome editing in *C. elegans* via a CRISPR-Cas9 system. *Nat.*  
594 *Methods* **10**, 741–743 (2013).
- 595 52. Hobert, O. PCR Fusion-Based Approach to Create Reporter Gene Constructs for Expression  
596 Analysis in Transgenic *C. elegans*. *Biotechniques* **32**, 728–730 (2002).
- 597 53. Mello, C. C., Kramer, J. M., Stinchcomb, D. & Ambros, V. Efficient gene transfer in *C. elegans*:  
598 extrachromosomal maintenance and integration of transforming sequences. *EMBO J.* **10**, 3959–  
599 70 (1991).
- 600 54. Miyabayashi, T., Palfreyman, M. T., Sluder, A. E., Slack, F. & Sengupta, P. Expression and  
601 function of members of a divergent nuclear receptor family in *Caenorhabditis elegans*. *Dev. Biol.*  
602 **214**, 314–331 (1999).
- 603 55. Mello, C. & Fire, A. Methods in Cell Biology. *Methods Cell Biol.* **48**, 451–482 (1995).
- 604 56. Dokshin, G. A., Ghanta, K. S., Piscopo, K. M. & Mello, C. C. Robust Genome Editing with Short  
605 Single-Stranded and Long, Partially Single-Stranded DNA Donors in *Caenorhabditis elegans*.  
606 *Genetics* **210**, 781–787 (2018).
- 607 57. Mangeol, P., Prevo, B. & Peterman, E. J. G. KymographClear and KymographDirect: two tools for  
608 the automated quantitative analysis of molecular and cellular dynamics using kymographs. *Mol.*  
609 *Biol. Cell* **27**, 1948–57 (2016).

610

## 611 **Figure Legends**

612 **Figure 1.** GCY-22::GFP traffics along the dendrite from the cell body to the base of the cilium and  
613 concentrates at the ciliary tip in the salt-sensing ASER neuron.

614 **(a)** Schematic of the head of the animal showing the ASER cell body, dendrite and cilium. Inserts:  
615 schematic of the cilium depicting the periciliary membrane compartment (PCMC), transition zone  
616 (TZ), and cilium tip, and fluorescence images with GCY-22::GFP (green) and mCherry (red) showing  
617 localization in the cell body, vesicles in the dendrite and localization to the PCMC and tip of the cilium.  
618 **(b)** Ectopic expression of GCY-22::GFP in the ASI neuron showing localization at the PCMC and  
619 cilium tip. **(c)** Kymograms showing dendritic transport tracks of GCY-22::GFP in wild-type background  
620 and reduced transport in a *dhc-1::GFP::degron* background in the presence of auxin (IAA). Black lines  
621 indicate moving and red lines indicate stationary vesicles. **(d)** Quantification of GFP molecules at the  
622 cilium tip of ASE neurons. Scale bars indicate 5  $\mu\text{m}$ .

623



624 **Figure 2.** GCY-22::GFP is present in stable pools at the PCMC and cilium tip.  
625 **(a)** Fluorescence recovery after photobleaching (FRAP) of the entire PCMC (n=7). **(b)** FRAP of the  
626 entire cilium tip compartment (n=8). **(c)** FRAP of half of the PCMC (n=19). Insert: Fluorescence  
627 images of the PCMC pre- and post-bleach. **(d)** FRAP of half of the tip compartment (n=6). Insert:  
628 fluorescence images of the tip pre- and post-bleach. **(e)** Fluorescence recovery of GCY-22::GFP  
629 (blue, n=19), TM::GFP (orange, n=11), and GFP (green, n=7) after photobleaching half of the PCMC.  
630 **(f)** Fluorescence recovery of GCY-22::GFP (blue, n=6), TM::GFP (orange, n=7), and GFP (green,  
631 n=6) after photobleaching half of the tip compartment. Scale bars represent 1  $\mu\text{m}$ . Colored areas  
632 indicate SD.

633  
634 **Figure 3.** The GCY-22-containing cilium tip compartment is actively maintained by IFT.  
635 **(a)** Kymogram of GCY-22::GFP showing anterograde and retrograde ciliary transport and possible  
636 diffusion tracks. Black arrowhead indicates stationary signal. **(b)** Kymograms showing partial overlap  
637 of IFT tracks of GCY-22::GFP (green) and of the mCherry-tagged anterograde IFT motor protein  
638 OSM-3 (red). **(c)** Quantification of track length of GCY-22::GFP (green, n=13 cilia), OSM-3::mCherry  
639 (left graph, red, n=7 cilia), and tdTomato-tagged retrograde IFT motor protein XBX-1 (right graph, red,  
640 n=24 cilia). Asterisks indicate significant difference in length (*P*-value: \* <0.05, \*\* <0.01, \*\*\* <0.001,  
641 two-tailed Mann-Whitney U test). **(d)** Quantification of normalized fluorescence intensity in different  
642 mutant backgrounds of GCY-22::GFP in the PCMC, axoneme and cilium tip. Distribution of  
643 fluorescence between the PCMC (green), axoneme (orange) and cilium tip (blue). Significant  
644 differences (*P*-value <0.05) are indicated by colored asterisks (black is total cilium fluorescence,  
645 ANOVA followed by pairwise t-test with Holm correction), n $\geq$ 5. **(e)** Representative fluorescence  
646 images and schematics showing localization of GCY-22::GFP in PCMC and cilium in different mutant  
647 backgrounds. Scale bar represents 5  $\mu\text{m}$ .

648  
649 **Figure 4.** Maintenance of the GCY-22-containing cilium tip compartment is ATP dependent.  
650 **(a)** Fluorescence images of GCY-22::GFP showing cilium tip collapse and kymograms of OSM-  
651 3::mCherry showing IFT arrest during NaN<sub>3</sub> treatment. Asterisk indicates PCMC, arrowheads indicate  
652 proximal end of tip compartment. **(b)** Quantification of distal segment IFT capacity (number of tracks  
653 multiplied by speed) during NaN<sub>3</sub> treatment (n=7) and linear regression (black line, R<sup>2</sup>=0.37). **(c)**  
654 Quantification of cilium length (red) and cilium tip (blue) during NaN<sub>3</sub> treatment. Darker lines show  
655 time-normalized, average result (n=7). **(d)** Representative fluorescence images showing recovery of  
656 the cilium tip compartment after 30 min of NaN<sub>3</sub> treatment (n=5). Arrowheads indicate proximal end of  
657 tip compartment. Scale bars represent 5  $\mu\text{m}$ .

658  
659 **Figure 5.** Cilium tip localization of GCY-22::GFP requires the dimerization and RD3-associated  
660 domains. Schematic of GCY-22::GFP wild-type and different chimeric proteins showing deleted  
661 domains: extracellular receptor domain ( $\Delta\text{ER}$ ), C-terminal tail ( $\Delta\text{CT}$ ), RD3-associated domain

662 ( $\Delta$ RD3), dimerization domain ( $\Delta$ DD), transmembrane domain only (TM::GFP), transmembrane  
663 domain and RD3-associated domain fused to GFP in two orientations (TM::RD3::GFP and  
664 TM::GFP::RD3) and chimeric proteins with GCY-22 domains replaced with corresponding DAF-11  
665 domains, transmembrane domain (TM>DAF-11TM) and CRISPR/Cas9 based C-terminal tail  
666 (CT>DAF-11CT). Fluorescence images showing corresponding localization of GCY-22::GFP versions  
667 (green) and XBX-1::tdTomato (red).

668

669 **Figure 6.** Cilium tip localization of GCY-22 is required for sensitive detection of NaCl.

670 **(a)** Chemotaxis indexes of different mutants showing wild type response of *gcy-22::GFP* animals and  
671 involvement of GCY-22. **(b)** Chemotaxis to 1, 10 and 100 mM NaCl requires the IFT anterograde  
672 motor OSM-3, and the BBSome subunit BBS-8 for chemotaxis to 1 mM. **(c)** Chemotaxis to 1, 10, and  
673 100 mM NaCl requires the Ankyrin2 protein DAF-25, and the TZ component MKS-5 for chemotaxis to  
674 1 and 10 mM. **(d)** Chemotaxis to 1 and 10 mM NaCl requires cilium tip localization of GCY-22 and  
675 involves GCY-14. Asterisks indicate significant difference compared to wild type. ANOVA followed by  
676 pairwise t-test with Holm correction,  $n \geq 6$  assays. Full statistical analysis can be found in  
677 Supplementary table 2.

678

679 **Supplementary Figure 1.** GCY-22::GFP colocalizes with TRAM-1 and APT-9 positive vesicles in the  
680 ASER cell bodies of wild-type animals. (a) Fluorescence images of ASER cell bodies showing GCY-  
681 22::GFP (green) and the ER-marker TRAM-1::mCherry (red), and colocalization (composite). (b)  
682 Fluorescence images of ASER cell bodies showing GCY-22::GFP (green) and the Golgi-marker APT-  
683 9::mCherry (red), and colocalization (composite). (c) Fluorescence images showing more diffuse  
684 localization of GCY-22::GFP (green) in *daf-25* and *rdl-1* mutant animals, APT-9::mCherry positive  
685 vesicles (red) and no colocalization in *daf-25* animals and partial colocalization *rdl-1* animals  
686 (composite). Scale bars represent 5  $\mu$ m.

687

688 **Supplementary Figure 2.** Kymograms of dendritic transport of GCY-22::GFP showing vesicular  
689 transport in wild-type animals and reduced transport in different mutant backgrounds. Examples of  
690 transport (arrowheads) and stationary signal (asterisks) are indicated. Scale bars represent 9 seconds  
691 (vertical) and 2  $\mu$ m (horizontal).

692

693 **Supplementary Figure 3.** GCY-22::GFP localization in the cell body, dendrite and cilium of the ASER  
694 neurons in wild-type and different mutant backgrounds.

695

696 **Supplementary Figure 4.** Fluorescence images of chimeric proteins containing the transmembrane  
697 domain and RD3-associated domain (RD3) and GFP in the cell body, dendrite, and cilium of ASER  
698 neurons. Kymograms of the dendrite showing diffuse signal and occasional vesicular transport and of  
699 the cilium showing diffuse signal only. Asterisks indicate PCMC, scale bar indicates 5  $\mu$ m.

700

701 **Supplementary Figure 5.** Genomic sequences of alleles generated in this research using

702 CRISPR/Cas9.
